# Supplementary material
Source: publisher figshare collection journal article supplement (https://springernature.figshare.com/ndownloader/files/28130916)
Supplement: Supplementary file 1 [file 28130916]

datetime	id	value
1596250800	2	0.029
1596250800	3	0.039
1596250800	5	0.017
1596250800	6	0.003
1596250800	9	0.006
1596251700	2	0.016
1596251700	3	0.038
1596251700	5	0.007
1596251700	6	0.001
1596251700	9	0.006
1596252600	2	0.014
1596252600	3	0.039
1596252600	5	0.016
1596252600	6	0.001
1596252600	9	0.032
1596253500	2	0.017
1596253500	3	0.039
1596253500	5	0.009
1596253500	6	0.002
1596253500	9	0.003
1596254400	2	0.008
1596254400	3	0.039
1596254400	5	0.02
1596254400	6	0.001
1596254400	9	0.0
1596255300	2	0.013
1596255300	3	0.039
1596255300	5	0.01
1596255300	6	0.001
1596255300	9	0.021
1596256200	2	0.017
1596256200	3	0.04
1596256200	5	0.019
1596256200	6	0.001
1596256200	9	0.056
1596257100	2	0.006
1596257100	3	0.038
1596257100	5	0.008
1596257100	6	0.001
1596257100	9	0.0
1596258000	2	0.015
1596258000	3	0.039
1596258000	5	0.014
1596258000	6	0.001
1596258000	9	0.0
1596258900	2	0.017
1596258900	3	0.039
1596258900	5	0.01
1596258900	6	0.001
1596258900	9	0.0
1596259800	2	0.004
1596259800	3	0.039
1596259800	5	0.013
1596259800	6	0.0
1596259800	9	0.033
1596260700	2	0.017
1596260700	3	0.039
1596260700	5	0.014
1596260700	6	0.0
1596260700	9	0.0
1596261600	2	0.017
1596261600	3	0.04
1596261600	5	0.013
1596261600	6	0.0
1596261600	9	0.0
1596262500	2	0.004
1596262500	3	0.039
1596262500	5	0.015
1596262500	6	0.0
1596262500	9	0.0
1596263400	2	0.017
1596263400	3	0.039
1596263400	5	0.008
1596263400	6	0.0
1596263400	9	0.063
1596264300	2	0.016
1596264300	3	0.039
1596264300	5	0.028
1596264300	6	0.0
1596264300	9	0.015
1596265200	2	0.004
1596265200	3	0.039
1596265200	5	0.012
1596265200	6	0.0
1596265200	9	0.0
1596266100	2	0.017
1596266100	3	0.04
1596266100	5	0.019
1596266100	6	0.0
1596266100	9	0.0
1596267000	2	0.014
1596267000	3	0.039
1596267000	5	0.008
1596267000	6	0.0
1596267000	9	0.03
1596267900	2	0.007
1596267900	3	0.039
1596267900	5	0.017
1596267900	6	0.0
1596267900	9	0.003
1596268800	2	0.016
1596268800	3	0.04
1596268800	5	0.008
1596268800	6	0.0
1596268800	9	0.0
1596269700	2	0.011
1596269700	3	0.039
1596269700	5	0.022
1596269700	6	0.0
1596269700	9	0.0
1596270600	2	0.01
1596270600	3	0.039
1596270600	5	0.009
1596270600	6	0.0
1596270600	9	0.025
1596271500	2	0.016
1596271500	3	0.04
1596271500	5	0.014
1596271500	6	0.0
1596271500	9	0.039
1596272400	2	0.007
1596272400	3	0.039
1596272400	5	0.012
1596272400	6	0.0
1596272400	9	0.014
1596273300	2	0.014
1596273300	3	0.039
1596273300	5	0.009
1596273300	6	0.0
1596273300	9	0.0
1596274200	2	0.016
1596274200	3	0.039
1596274200	5	0.017
1596274200	6	0.0
1596274200	9	0.016
1596275100	2	0.004
1596275100	3	0.04
1596275100	5	0.008
1596275100	6	0.0
1596275100	9	0.018
1596276000	2	0.016
1596276000	3	0.039
1596276000	5	0.018
1596276000	6	0.001
1596276000	9	0.0
1596276900	2	0.14
1596276900	3	0.039
1596276900	5	0.008
1596276900	6	0.007
1596276900	9	0.0
1596277800	2	0.185
1596277800	3	0.029
1596277800	5	0.039
1596277800	6	0.008
1596277800	9	0.005
1596278700	2	0.194
1596278700	3	0.0
1596278700	5	0.014
1596278700	6	0.004
1596278700	9	0.082
1596279600	2	0.187
1596279600	3	0.0
1596279600	5	0.034
1596279600	6	0.003
1596279600	9	0.505
1596280500	2	0.228
1596280500	3	0.0
1596280500	5	0.036
1596280500	6	0.002
1596280500	9	0.244
1596281400	2	0.191
1596281400	3	0.0
1596281400	5	0.029
1596281400	6	0.0
1596281400	9	0.021
1596282300	2	0.189
1596282300	3	0.0
1596282300	5	0.016
1596282300	6	0.0
1596282300	9	0.016
1596283200	2	0.195
1596283200	3	0.0
1596283200	5	0.012
1596283200	6	0.0
1596283200	9	0.001
1596284100	2	0.2
1596284100	3	0.0
1596284100	5	0.017
1596284100	6	0.0
1596284100	9	0.003
1596285000	2	0.185
1596285000	3	0.0
1596285000	5	0.213
1596285000	6	0.0
1596285000	9	0.136
1596285900	2	0.18
1596285900	3	0.0
1596285900	5	0.772
1596285900	6	0.0
1596285900	9	0.005
1596286800	2	0.017
1596286800	3	0.0
1596286800	5	0.011
1596286800	6	0.0
1596286800	9	0.002
1596287700	2	0.004
1596287700	3	0.0
1596287700	5	0.013
1596287700	6	0.0
1596287700	9	0.018
1596288600	2	0.016
1596288600	3	0.0
1596288600	5	0.018
1596288600	6	0.0
1596288600	9	0.143
1596289500	2	0.014
1596289500	3	0.0
1596289500	5	0.009
1596289500	6	0.0
1596289500	9	0.07
1596290400	2	0.039
1596290400	3	0.0
1596290400	5	0.017
1596290400	6	0.0
1596290400	9	0.0
1596291300	2	0.032
1596291300	3	0.0
1596291300	5	0.008
1596291300	6	0.0
1596291300	9	0.0
1596292200	2	0.043
1596292200	3	0.0
1596292200	5	0.017
1596292200	6	0.0
1596292200	9	0.033
1596293100	2	0.077
1596293100	3	0.0
1596293100	5	0.023
1596293100	6	0.0
1596293100	9	0.0
1596294000	2	0.062
1596294000	3	0.0
1596294000	5	0.027
1596294000	6	0.0
1596294000	9	0.0
1596294900	2	0.041
1596294900	3	0.0
1596294900	5	0.009
1596294900	6	0.0
1596294900	9	0.105
1596295800	2	0.097
1596295800	3	0.0
1596295800	5	0.017
1596295800	6	0.0
1596295800	9	0.062
1596296700	2	0.083
1596296700	3	0.0
1596296700	5	0.009
1596296700	6	0.0
1596296700	9	0.016
1596297600	2	0.08
1596297600	3	0.0
1596297600	5	0.023
1596297600	6	0.0
1596297600	9	0.002
1596298500	2	0.068
1596298500	3	0.0
1596298500	5	0.009
1596298500	6	0.0
1596298500	9	0.037
1596299400	2	0.076
1596299400	3	0.0
1596299400	5	0.018
1596299400	6	0.0
1596299400	9	0.002
1596300300	2	0.066
1596300300	3	0.0
1596300300	5	0.008
1596300300	6	0.0
1596300300	9	0.0
1596301200	2	0.047
1596301200	3	0.0
1596301200	5	0.02
1596301200	6	0.003
1596301200	9	0.019
1596302100	2	0.033
1596302100	3	0.0
1596302100	5	0.012
1596302100	6	0.007
1596302100	9	0.014
1596303000	2	0.045
1596303000	3	0.0
1596303000	5	0.018
1596303000	6	0.009
1596303000	9	0.029
1596303900	2	0.045
1596303900	3	0.0
1596303900	5	0.012
1596303900	6	0.044
1596303900	9	0.021
1596304800	2	0.036
1596304800	3	0.0
1596304800	5	0.017
1596304800	6	0.0
1596304800	9	0.028
1596305700	2	0.042
1596305700	3	0.0
1596305700	5	0.02
1596305700	6	0.0
1596305700	9	0.0
1596306600	2	0.046
1596306600	3	0.0
1596306600	5	0.012
1596306600	6	0.0
1596306600	9	0.0
1596307500	2	0.038
1596307500	3	0.0
1596307500	5	0.018
1596307500	6	0.0
1596307500	9	0.033
1596308400	2	0.058
1596308400	3	0.0
1596308400	5	0.009
1596308400	6	0.0
1596308400	9	0.0
1596309300	2	0.048
1596309300	3	0.0
1596309300	5	0.021
1596309300	6	0.0
1596309300	9	0.001
1596310200	2	0.04
1596310200	3	0.0
1596310200	5	0.013
1596310200	6	0.0
1596310200	9	0.085
1596311100	2	0.042
1596311100	3	0.0
1596311100	5	0.018
1596311100	6	0.0
1596311100	9	0.014
1596312000	2	0.047
1596312000	3	0.0
1596312000	5	0.009
1596312000	6	0.0
1596312000	9	0.014
1596312900	2	0.09
1596312900	3	0.0
1596312900	5	0.02
1596312900	6	0.0
1596312900	9	0.042
1596313800	2	0.037
1596313800	3	0.0
1596313800	5	0.02
1596313800	6	0.0
1596313800	9	0.0
1596314700	2	0.047
1596314700	3	0.0
1596314700	5	0.014
1596314700	6	0.0
1596314700	9	0.0
1596315600	2	0.046
1596315600	3	0.0
1596315600	5	0.017
1596315600	6	0.0
1596315600	9	0.033
1596316500	2	0.036
1596316500	3	0.008
1596316500	5	0.024
1596316500	6	0.0
1596316500	9	0.034
1596317400	2	0.044
1596317400	3	0.038
1596317400	5	0.029
1596317400	6	0.004
1596317400	9	0.011
1596318300	2	0.046
1596318300	3	0.038
1596318300	5	0.01
1596318300	6	0.001
1596318300	9	0.032
1596319200	2	0.101
1596319200	3	0.038
1596319200	5	0.019
1596319200	6	0.002
1596319200	9	0.0
1596320100	2	0.181
1596320100	3	0.038
1596320100	5	0.021
1596320100	6	0.002
1596320100	9	0.0
1596321000	2	0.158
1596321000	3	0.038
1596321000	5	0.054
1596321000	6	0.009
1596321000	9	0.03
1596321900	2	0.14
1596321900	3	0.038
1596321900	5	0.055
1596321900	6	0.018
1596321900	9	0.003
1596322800	2	0.133
1596322800	3	0.038
1596322800	5	0.046
1596322800	6	0.006
1596322800	9	0.027
1596323700	2	0.076
1596323700	3	0.037
1596323700	5	0.051
1596323700	6	0.005
1596323700	9	0.036
1596324600	2	0.029
1596324600	3	0.038
1596324600	5	0.045
1596324600	6	0.019
1596324600	9	0.015
1596325500	2	0.026
1596325500	3	0.037
1596325500	5	0.079
1596325500	6	0.024
1596325500	9	0.0
1596326400	2	0.018
1596326400	3	0.038
1596326400	5	0.617
1596326400	6	0.007
1596326400	9	0.004
1596327300	2	0.028
1596327300	3	0.037
1596327300	5	0.103
1596327300	6	0.004
1596327300	9	0.028
1596328200	2	0.029
1596328200	3	0.038
1596328200	5	0.089
1596328200	6	0.003
1596328200	9	0.0
1596329100	2	0.016
1596329100	3	0.037
1596329100	5	0.092
1596329100	6	0.002
1596329100	9	0.018
1596330000	2	0.029
1596330000	3	0.038
1596330000	5	0.066
1596330000	6	0.003
1596330000	9	0.06
1596330900	2	0.029
1596330900	3	0.037
1596330900	5	0.065
1596330900	6	0.002
1596330900	9	0.0
1596331800	2	0.019
1596331800	3	0.038
1596331800	5	0.079
1596331800	6	0.001
1596331800	9	0.0
1596332700	2	0.026
1596332700	3	0.037
1596332700	5	0.085
1596332700	6	0.002
1596332700	9	0.033
1596333600	2	0.029
1596333600	3	0.038
1596333600	5	0.06
1596333600	6	0.001
1596333600	9	0.002
1596334500	2	0.022
1596334500	3	0.038
1596334500	5	0.025
1596334500	6	0.002
1596334500	9	0.0
1596335400	2	0.022
1596335400	3	0.037
1596335400	5	0.031
1596335400	6	0.002
1596335400	9	0.032
1596336300	2	0.026
1596336300	3	0.038
1596336300	5	0.009
1596336300	6	0.001
1596336300	9	0.045
1596337200	2	0.016
1596337200	3	0.038
1596337200	5	0.019
1596337200	6	0.002
1596337200	9	0.0
1596338100	2	0.01
1596338100	3	0.038
1596338100	5	0.011
1596338100	6	0.001
1596338100	9	0.001
1596339000	2	0.02
1596339000	3	0.038
1596339000	5	0.016
1596339000	6	0.001
1596339000	9	0.032
1596339900	2	0.017
1596339900	3	0.038
1596339900	5	0.017
1596339900	6	0.001
1596339900	9	0.0
1596340800	2	0.005
1596340800	3	0.038
1596340800	5	0.013
1596340800	6	0.0
1596340800	9	0.0
1596341700	2	0.017
1596341700	3	0.038
1596341700	5	0.02
1596341700	6	0.0
1596341700	9	0.04
1596342600	2	0.018
1596342600	3	0.038
1596342600	5	0.009
1596342600	6	0.0
1596342600	9	0.037
1596343500	2	0.004
1596343500	3	0.037
1596343500	5	0.023
1596343500	6	0.0
1596343500	9	0.0
1596344400	2	0.017
1596344400	3	0.038
1596344400	5	0.01
1596344400	6	0.0
1596344400	9	0.018
1596345300	2	0.017
1596345300	3	0.038
1596345300	5	0.02
1596345300	6	0.0
1596345300	9	0.015
1596346200	2	0.005
1596346200	3	0.038
1596346200	5	0.009
1596346200	6	0.0
1596346200	9	0.0
1596347100	2	0.017
1596347100	3	0.037
1596347100	5	0.02
1596347100	6	0.0
1596347100	9	0.0
1596348000	2	0.017
1596348000	3	0.038
1596348000	5	0.012
1596348000	6	0.0
1596348000	9	0.035
1596348900	2	0.006
1596348900	3	0.038
1596348900	5	0.018
1596348900	6	0.0
1596348900	9	0.044
1596349800	2	0.016
1596349800	3	0.037
1596349800	5	0.014
1596349800	6	0.0
1596349800	9	0.0
1596350700	2	0.017
1596350700	3	0.038
1596350700	5	0.014
1596350700	6	0.0
1596350700	9	0.028
1596351600	2	0.007
1596351600	3	0.038
1596351600	5	0.017
1596351600	6	0.0
1596351600	9	0.005
1596352500	2	0.015
1596352500	3	0.038
1596352500	5	0.013
1596352500	6	0.0
1596352500	9	0.0
1596353400	2	0.017
1596353400	3	0.037
1596353400	5	0.017
1596353400	6	0.0
1596353400	9	0.003
1596354300	2	0.008
1596354300	3	0.038
1596354300	5	0.01
1596354300	6	0.0
1596354300	9	0.031
1596355200	2	0.014
1596355200	3	0.038
1596355200	5	0.019
1596355200	6	0.0
1596355200	9	0.03
1596356100	2	0.017
1596356100	3	0.038
1596356100	5	0.01
1596356100	6	0.0
1596356100	9	0.016
1596357000	2	0.009
1596357000	3	0.038
1596357000	5	0.019
1596357000	6	0.0
1596357000	9	0.032
1596357900	2	0.013
1596357900	3	0.037
1596357900	5	0.009
1596357900	6	0.0
1596357900	9	0.002
1596358800	2	0.017
1596358800	3	0.038
1596358800	5	0.02
1596358800	6	0.0
1596358800	9	0.0
1596359700	2	0.01
1596359700	3	0.038
1596359700	5	0.009
1596359700	6	0.0
1596359700	9	0.0
1596360600	2	0.032
1596360600	3	0.038
1596360600	5	0.02
1596360600	6	0.0
1596360600	9	0.034
1596361500	2	0.196
1596361500	3	0.038
1596361500	5	0.009
1596361500	6	0.0
1596361500	9	0.0
1596362400	2	0.191
1596362400	3	0.038
1596362400	5	0.028
1596362400	6	0.0
1596362400	9	0.044
1596363300	2	0.19
1596363300	3	0.037
1596363300	5	0.008
1596363300	6	0.001
1596363300	9	0.025
1596364200	2	0.196
1596364200	3	0.038
1596364200	5	0.02
1596364200	6	0.005
1596364200	9	0.009
1596365100	2	0.193
1596365100	3	0.038
1596365100	5	0.01
1596365100	6	0.004
1596365100	9	0.0
1596366000	2	0.24
1596366000	3	0.01
1596366000	5	0.027
1596366000	6	0.006
1596366000	9	0.0
1596366900	2	0.207
1596366900	3	0.0
1596366900	5	0.012
1596366900	6	0.0
1596366900	9	0.033
1596367800	2	0.202
1596367800	3	0.0
1596367800	5	0.022
1596367800	6	0.0
1596367800	9	0.011
1596368700	2	0.195
1596368700	3	0.0
1596368700	5	0.02
1596368700	6	0.0
1596368700	9	0.025
1596369600	2	0.199
1596369600	3	0.0
1596369600	5	0.015
1596369600	6	0.0
1596369600	9	0.059
1596370500	2	0.193
1596370500	3	0.0
1596370500	5	0.019
1596370500	6	0.003
1596370500	9	0.028
1596371400	2	0.046
1596371400	3	0.0
1596371400	5	0.022
1596371400	6	0.009
1596371400	9	0.025
1596372300	2	0.019
1596372300	3	0.0
1596372300	5	0.026
1596372300	6	0.011
1596372300	9	0.087
1596373200	2	0.015
1596373200	3	0.0
1596373200	5	0.021
1596373200	6	0.01
1596373200	9	0.0
1596374100	2	0.01
1596374100	3	0.0
1596374100	5	0.036
1596374100	6	0.003
1596374100	9	0.0
1596375000	2	0.029
1596375000	3	0.0
1596375000	5	0.022
1596375000	6	0.004
1596375000	9	0.013
1596375900	2	0.026
1596375900	3	0.0
1596375900	5	0.034
1596375900	6	0.003
1596375900	9	0.065
1596376800	2	0.018
1596376800	3	0.0
1596376800	5	0.027
1596376800	6	0.003
1596376800	9	0.0
1596377700	2	0.029
1596377700	3	0.0
1596377700	5	0.033
1596377700	6	0.003
1596377700	9	0.015
1596378600	2	0.027
1596378600	3	0.0
1596378600	5	0.023
1596378600	6	0.005
1596378600	9	0.022
1596379500	2	0.017
1596379500	3	0.0
1596379500	5	0.034
1596379500	6	0.003
1596379500	9	0.001
1596380400	2	0.029
1596380400	3	0.0
1596380400	5	0.042
1596380400	6	0.0
1596380400	9	0.179
1596381300	2	0.029
1596381300	3	0.0
1596381300	5	0.023
1596381300	6	0.0
1596381300	9	0.281
1596382200	2	0.036
1596382200	3	0.0
1596382200	5	0.03
1596382200	6	0.0
1596382200	9	0.278
1596383100	2	0.067
1596383100	3	0.0
1596383100	5	0.038
1596383100	6	0.0
1596383100	9	0.278
1596384000	2	0.049
1596384000	3	0.0
1596384000	5	0.028
1596384000	6	0.0
1596384000	9	0.001
1596384900	2	0.049
1596384900	3	0.0
1596384900	5	0.064
1596384900	6	0.0
1596384900	9	0.035
1596385800	2	0.038
1596385800	3	0.0
1596385800	5	0.048
1596385800	6	0.0
1596385800	9	0.001
1596386700	2	0.038
1596386700	3	0.0
1596386700	5	0.048
1596386700	6	0.0
1596386700	9	0.006
1596387600	2	0.053
1596387600	3	0.0
1596387600	5	0.029
1596387600	6	0.0
1596387600	9	0.033
1596388500	2	0.046
1596388500	3	0.0
1596388500	5	0.029
1596388500	6	0.0
1596388500	9	0.044
1596389400	2	0.027
1596389400	3	0.0
1596389400	5	0.035
1596389400	6	0.0
1596389400	9	0.038
1596390300	2	0.025
1596390300	3	0.0
1596390300	5	0.023
1596390300	6	0.0
1596390300	9	0.005
1596391200	2	0.034
1596391200	3	0.0
1596391200	5	0.034
1596391200	6	0.0
1596391200	9	0.019
1596392100	2	0.031
1596392100	3	0.0
1596392100	5	0.023
1596392100	6	0.0
1596392100	9	0.015
1596393000	2	0.02
1596393000	3	0.0
1596393000	5	0.033
1596393000	6	0.0
1596393000	9	0.0
1596393900	2	0.03
1596393900	3	0.0
1596393900	5	0.028
1596393900	6	0.0
1596393900	9	0.061
1596394800	2	0.032
1596394800	3	0.0
1596394800	5	0.038
1596394800	6	0.0
1596394800	9	0.018
1596395700	2	0.023
1596395700	3	0.0
1596395700	5	0.075
1596395700	6	0.0
1596395700	9	0.013
1596396600	2	0.025
1596396600	3	0.0
1596396600	5	0.063
1596396600	6	0.0
1596396600	9	0.02
1596397500	2	0.031
1596397500	3	0.0
1596397500	5	0.076
1596397500	6	0.0
1596397500	9	0.0
1596398400	2	0.028
1596398400	3	0.0
1596398400	5	0.023
1596398400	6	0.0
1596398400	9	0.031
1596399300	2	0.02
1596399300	3	0.0
1596399300	5	0.034
1596399300	6	0.0
1596399300	9	0.021
1596400200	2	0.031
1596400200	3	0.0
1596400200	5	0.025
1596400200	6	0.0
1596400200	9	0.027
1596401100	2	0.024
1596401100	3	0.0
1596401100	5	0.033
1596401100	6	0.0
1596401100	9	0.033
1596402000	2	0.009
1596402000	3	0.0
1596402000	5	0.04
1596402000	6	0.0
1596402000	9	0.0
1596402900	2	0.025
1596402900	3	0.002
1596402900	5	0.032
1596402900	6	0.0
1596402900	9	0.003
1596403800	2	0.022
1596403800	3	0.037
1596403800	5	0.055
1596403800	6	0.0
1596403800	9	0.03
1596404700	2	0.015
1596404700	3	0.038
1596404700	5	0.071
1596404700	6	0.002
1596404700	9	0.004
1596405600	2	0.041
1596405600	3	0.038
1596405600	5	0.109
1596405600	6	0.019
1596405600	9	0.276
1596406500	2	0.033
1596406500	3	0.038
1596406500	5	0.111
1596406500	6	0.026
1596406500	9	0.418
1596407400	2	0.023
1596407400	3	0.038
1596407400	5	0.856
1596407400	6	0.26
1596407400	9	0.014
1596408300	2	0.037
1596408300	3	0.037
1596408300	5	0.095
1596408300	6	0.02
1596408300	9	0.046
1596409200	2	0.032
1596409200	3	0.038
1596409200	5	0.107
1596409200	6	0.02
1596409200	9	0.017
1596410100	2	0.023
1596410100	3	0.038
1596410100	5	0.089
1596410100	6	0.02
1596410100	9	0.144
1596411000	2	0.036
1596411000	3	0.037
1596411000	5	1.155
1596411000	6	0.02
1596411000	9	0.075
1596411900	2	0.033
1596411900	3	0.038
1596411900	5	0.129
1596411900	6	0.016
1596411900	9	0.021
1596412800	2	0.022
1596412800	3	0.038
1596412800	5	0.063
1596412800	6	0.001
1596412800	9	0.039
1596413700	2	0.036
1596413700	3	0.038
1596413700	5	0.07
1596413700	6	0.0
1596413700	9	0.032
1596414600	2	0.035
1596414600	3	0.037
1596414600	5	0.054
1596414600	6	0.0
1596414600	9	0.019
1596415500	2	0.022
1596415500	3	0.038
1596415500	5	0.064
1596415500	6	0.0
1596415500	9	0.05
1596416400	2	0.034
1596416400	3	0.037
1596416400	5	0.05
1596416400	6	0.0
1596416400	9	0.05
1596417300	2	0.035
1596417300	3	0.037
1596417300	5	0.083
1596417300	6	0.001
1596417300	9	0.05
1596418200	2	0.023
1596418200	3	0.037
1596418200	5	0.044
1596418200	6	0.003
1596418200	9	0.066
1596419100	2	0.031
1596419100	3	0.037
1596419100	5	0.071
1596419100	6	0.008
1596419100	9	0.033
1596420000	2	0.035
1596420000	3	0.036
1596420000	5	0.032
1596420000	6	0.009
1596420000	9	0.033
1596420900	2	0.026
1596420900	3	0.037
1596420900	5	0.021
1596420900	6	0.009
1596420900	9	0.067
1596421800	2	0.028
1596421800	3	0.037
1596421800	5	0.024
1596421800	6	0.009
1596421800	9	0.029
1596422700	2	0.035
1596422700	3	0.036
1596422700	5	0.017
1596422700	6	0.01
1596422700	9	0.037
1596423600	2	0.024
1596423600	3	0.037
1596423600	5	0.029
1596423600	6	0.005
1596423600	9	0.036
1596424500	2	0.022
1596424500	3	0.037
1596424500	5	0.017
1596424500	6	0.001
1596424500	9	0.0
1596425400	2	0.019
1596425400	3	0.038
1596425400	5	0.027
1596425400	6	0.001
1596425400	9	0.0
1596426300	2	0.009
1596426300	3	0.037
1596426300	5	0.015
1596426300	6	0.001
1596426300	9	0.033
1596427200	2	0.014
1596427200	3	0.037
1596427200	5	0.027
1596427200	6	0.001
1596427200	9	0.0
1596428100	2	0.018
1596428100	3	0.038
1596428100	5	0.013
1596428100	6	0.001
1596428100	9	0.044
1596429000	2	0.013
1596429000	3	0.036
1596429000	5	0.026
1596429000	6	0.001
1596429000	9	0.033
1596429900	2	0.009
1596429900	3	0.038
1596429900	5	0.015
1596429900	6	0.0
1596429900	9	0.0
1596430800	2	0.019
1596430800	3	0.037
1596430800	5	0.026
1596430800	6	0.001
1596430800	9	0.0
1596431700	2	0.017
1596431700	3	0.038
1596431700	5	0.015
1596431700	6	0.001
1596431700	9	0.034
1596432600	2	0.005
1596432600	3	0.038
1596432600	5	0.027
1596432600	6	0.0
1596432600	9	0.0
1596433500	2	0.018
1596433500	3	0.037
1596433500	5	0.015
1596433500	6	0.0
1596433500	9	0.026
1596434400	2	0.018
1596434400	3	0.038
1596434400	5	0.025
1596434400	6	0.0
1596434400	9	0.051
1596435300	2	0.007
1596435300	3	0.038
1596435300	5	0.014
1596435300	6	0.0
1596435300	9	0.0
1596436200	2	0.014
1596436200	3	0.039
1596436200	5	0.027
1596436200	6	0.0
1596436200	9	0.0
1596437100	2	0.018
1596437100	3	0.038
1596437100	5	0.014
1596437100	6	0.0
1596437100	9	0.031
1596438000	2	0.011
1596438000	3	0.038
1596438000	5	0.027
1596438000	6	0.0
1596438000	9	0.003
1596438900	2	0.011
1596438900	3	0.039
1596438900	5	0.014
1596438900	6	0.0
1596438900	9	0.002
1596439800	2	0.017
1596439800	3	0.038
1596439800	5	0.026
1596439800	6	0.0
1596439800	9	0.064
1596440700	2	0.014
1596440700	3	0.038
1596440700	5	0.015
1596440700	6	0.0
1596440700	9	0.013
1596441600	2	0.008
1596441600	3	0.038
1596441600	5	0.026
1596441600	6	0.0
1596441600	9	0.0
1596442500	2	0.017
1596442500	3	0.037
1596442500	5	0.014
1596442500	6	0.0
1596442500	9	0.004
1596443400	2	0.017
1596443400	3	0.038
1596443400	5	0.026
1596443400	6	0.0
1596443400	9	0.032
1596444300	2	0.004
1596444300	3	0.039
1596444300	5	0.048
1596444300	6	0.0
1596444300	9	0.0
1596445200	2	0.017
1596445200	3	0.038
1596445200	5	0.052
1596445200	6	0.0
1596445200	9	0.029
1596446100	2	0.105
1596446100	3	0.038
1596446100	5	0.048
1596446100	6	0.0
1596446100	9	0.05
1596447000	2	0.186
1596447000	3	0.038
1596447000	5	0.036
1596447000	6	0.0
1596447000	9	0.0
1596447900	2	0.196
1596447900	3	0.039
1596447900	5	0.025
1596447900	6	0.0
1596447900	9	0.0
1596448800	2	0.194
1596448800	3	0.037
1596448800	5	0.037
1596448800	6	0.0
1596448800	9	0.023
1596449700	2	0.188
1596449700	3	0.038
1596449700	5	0.025
1596449700	6	0.0
1596449700	9	0.011
1596450600	2	0.195
1596450600	3	0.037
1596450600	5	0.035
1596450600	6	0.006
1596450600	9	0.001
1596451500	2	0.208
1596451500	3	0.005
1596451500	5	0.026
1596451500	6	0.009
1596451500	9	0.048
1596452400	2	0.258
1596452400	3	0.0
1596452400	5	0.032
1596452400	6	0.004
1596452400	9	0.041
1596453300	2	0.212
1596453300	3	0.0
1596453300	5	0.029
1596453300	6	0.005
1596453300	9	0.001
1596454200	2	0.117
1596454200	3	0.0
1596454200	5	0.059
1596454200	6	0.0
1596454200	9	0.01
1596455100	2	0.039
1596455100	3	0.0
1596455100	5	0.036
1596455100	6	0.0
1596455100	9	0.027
1596456000	2	0.04
1596456000	3	0.0
1596456000	5	0.014
1596456000	6	0.0
1596456000	9	0.001
1596456900	2	0.034
1596456900	3	0.0
1596456900	5	0.016
1596456900	6	0.0
1596456900	9	0.013
1596457800	2	0.014
1596457800	3	0.0
1596457800	5	0.01
1596457800	6	0.0
1596457800	9	0.068
1596458700	2	0.013
1596458700	3	0.0
1596458700	5	0.02
1596458700	6	0.0
1596458700	9	0.0
1596459600	2	0.02
1596459600	3	0.0
1596459600	5	0.011
1596459600	6	0.0
1596459600	9	0.0
1596460500	2	0.015
1596460500	3	0.0
1596460500	5	0.021
1596460500	6	0.0
1596460500	9	0.031
1596461400	2	0.011
1596461400	3	0.0
1596461400	5	0.011
1596461400	6	0.0
1596461400	9	0.003
1596462300	2	0.021
1596462300	3	0.0
1596462300	5	0.021
1596462300	6	0.0
1596462300	9	0.002
1596463200	2	0.016
1596463200	3	0.0
1596463200	5	0.01
1596463200	6	0.0
1596463200	9	0.036
1596464100	2	0.018
1596464100	3	0.0
1596464100	5	0.021
1596464100	6	0.0
1596464100	9	0.047
1596465000	2	0.061
1596465000	3	0.0
1596465000	5	0.013
1596465000	6	0.0
1596465000	9	0.0
1596465900	2	0.054
1596465900	3	0.0
1596465900	5	0.024
1596465900	6	0.0
1596465900	9	0.022
1596466800	2	0.058
1596466800	3	0.0
1596466800	5	0.011
1596466800	6	0.0
1596466800	9	0.015
1596467700	2	0.069
1596467700	3	0.0
1596467700	5	0.027
1596467700	6	0.0
1596467700	9	0.001
1596468600	2	0.084
1596468600	3	0.0
1596468600	5	0.028
1596468600	6	0.0
1596468600	9	0.026
1596469500	2	0.034
1596469500	3	0.0
1596469500	5	0.03
1596469500	6	0.0
1596469500	9	0.047
1596470400	2	0.069
1596470400	3	0.0
1596470400	5	0.015
1596470400	6	0.0
1596470400	9	0.02
1596471300	2	0.066
1596471300	3	0.0
1596471300	5	0.023
1596471300	6	0.0
1596471300	9	0.037
1596472200	2	0.053
1596472200	3	0.0
1596472200	5	0.01
1596472200	6	0.0
1596472200	9	0.016
1596473100	2	0.068
1596473100	3	0.0
1596473100	5	0.027
1596473100	6	0.0
1596473100	9	0.031
1596474000	2	0.064
1596474000	3	0.0
1596474000	5	0.013
1596474000	6	0.0
1596474000	9	0.008
1596474900	2	0.039
1596474900	3	0.0
1596474900	5	0.025
1596474900	6	0.0
1596474900	9	0.032
1596475800	2	0.052
1596475800	3	0.0
1596475800	5	0.015
1596475800	6	0.0
1596475800	9	0.051
1596476700	2	0.029
1596476700	3	0.0
1596476700	5	0.022
1596476700	6	0.0
1596476700	9	0.009
1596477600	2	0.016
1596477600	3	0.0
1596477600	5	0.017
1596477600	6	0.0
1596477600	9	0.031
1596478500	2	0.033
1596478500	3	0.0
1596478500	5	0.02
1596478500	6	0.0
1596478500	9	0.001
1596479400	2	0.023
1596479400	3	0.0
1596479400	5	0.02
1596479400	6	0.0
1596479400	9	0.037
1596480300	2	0.017
1596480300	3	0.0
1596480300	5	0.016
1596480300	6	0.0
1596480300	9	0.039
1596481200	2	0.023
1596481200	3	0.0
1596481200	5	0.022
1596481200	6	0.0
1596481200	9	0.032
1596482100	2	0.048
1596482100	3	0.0
1596482100	5	0.013
1596482100	6	0.0
1596482100	9	0.014
1596483000	2	0.051
1596483000	3	0.0
1596483000	5	0.023
1596483000	6	0.0
1596483000	9	0.001
1596483900	2	0.038
1596483900	3	0.0
1596483900	5	0.014
1596483900	6	0.0
1596483900	9	0.036
1596484800	2	0.057
1596484800	3	0.0
1596484800	5	0.023
1596484800	6	0.0
1596484800	9	0.002
1596485700	2	0.044
1596485700	3	0.0
1596485700	5	0.011
1596485700	6	0.0
1596485700	9	0.071
1596486600	2	0.047
1596486600	3	0.0
1596486600	5	0.023
1596486600	6	0.0
1596486600	9	0.009
1596487500	2	0.1
1596487500	3	0.0
1596487500	5	0.012
1596487500	6	0.0
1596487500	9	0.002
1596488400	2	0.036
1596488400	3	0.0
1596488400	5	0.025
1596488400	6	0.028
1596488400	9	0.048
1596489300	2	0.048
1596489300	3	0.0
1596489300	5	0.016
1596489300	6	0.005
1596489300	9	0.015
1596490200	2	0.052
1596490200	3	0.031
1596490200	5	0.034
1596490200	6	0.005
1596490200	9	0.058
1596491100	2	0.046
1596491100	3	0.036
1596491100	5	0.041
1596491100	6	0.004
1596491100	9	0.052
1596492000	2	0.033
1596492000	3	0.037
1596492000	5	0.044
1596492000	6	0.005
1596492000	9	0.018
1596492900	2	0.033
1596492900	3	0.038
1596492900	5	0.059
1596492900	6	0.005
1596492900	9	0.051
1596493800	2	0.026
1596493800	3	0.037
1596493800	5	0.053
1596493800	6	0.006
1596493800	9	0.017
1596494700	2	0.022
1596494700	3	0.038
1596494700	5	0.053
1596494700	6	0.007
1596494700	9	0.024
1596495600	2	0.033
1596495600	3	0.038
1596495600	5	0.073
1596495600	6	0.011
1596495600	9	0.076
1596496500	2	0.031
1596496500	3	0.037
1596496500	5	0.773
1596496500	6	0.005
1596496500	9	0.031
1596497400	2	0.018
1596497400	3	0.038
1596497400	5	0.308
1596497400	6	0.004
1596497400	9	0.031
1596498300	2	0.03
1596498300	3	0.038
1596498300	5	0.101
1596498300	6	0.006
1596498300	9	0.038
1596499200	2	0.033
1596499200	3	0.038
1596499200	5	0.075
1596499200	6	0.0
1596499200	9	0.018
1596500100	2	0.023
1596500100	3	0.038
1596500100	5	0.042
1596500100	6	0.0
1596500100	9	0.044
1596501000	2	0.024
1596501000	3	0.037
1596501000	5	0.029
1596501000	6	0.0
1596501000	9	0.504
1596501900	2	0.032
1596501900	3	0.038
1596501900	5	0.043
1596501900	6	0.0
1596501900	9	0.442
1596502800	2	0.028
1596502800	3	0.038
1596502800	5	0.029
1596502800	6	0.0
1596502800	9	0.04
1596503700	2	0.02
1596503700	3	0.038
1596503700	5	0.045
1596503700	6	0.0
1596503700	9	0.028
1596504600	2	0.032
1596504600	3	0.038
1596504600	5	0.403
1596504600	6	0.0
1596504600	9	0.127
1596505500	2	0.032
1596505500	3	0.039
1596505500	5	0.034
1596505500	6	0.0
1596505500	9	0.043
1596506400	2	0.02
1596506400	3	0.038
1596506400	5	0.017
1596506400	6	0.0
1596506400	9	0.065
1596507300	2	0.028
1596507300	3	0.038
1596507300	5	0.026
1596507300	6	0.0
1596507300	9	0.021
1596508200	2	0.032
1596508200	3	0.039
1596508200	5	0.021
1596508200	6	0.0
1596508200	9	0.219
1596509100	2	0.024
1596509100	3	0.038
1596509100	5	0.024
1596509100	6	0.0
1596509100	9	0.12
1596510000	2	0.019
1596510000	3	0.038
1596510000	5	0.019
1596510000	6	0.0
1596510000	9	0.47
1596510900	2	0.02
1596510900	3	0.039
1596510900	5	0.024
1596510900	6	0.0
1596510900	9	0.037
1596511800	2	0.018
1596511800	3	0.038
1596511800	5	0.019
1596511800	6	0.0
1596511800	9	0.053
1596512700	2	0.006
1596512700	3	0.039
1596512700	5	0.023
1596512700	6	0.0
1596512700	9	0.057
1596513600	2	0.02
1596513600	3	0.038
1596513600	5	0.018
1596513600	6	0.004
1596513600	9	0.015
1596514500	2	0.02
1596514500	3	0.039
1596514500	5	0.022
1596514500	6	0.02
1596514500	9	0.0
1596515400	2	0.009
1596515400	3	0.038
1596515400	5	0.019
1596515400	6	0.004
1596515400	9	0.035
1596516300	2	0.016
1596516300	3	0.039
1596516300	5	0.022
1596516300	6	0.004
1596516300	9	0.0
1596517200	2	0.02
1596517200	3	0.039
1596517200	5	0.017
1596517200	6	0.002
1596517200	9	0.038
1596518100	2	0.013
1596518100	3	0.038
1596518100	5	0.024
1596518100	6	0.001
1596518100	9	0.04
1596519000	2	0.011
1596519000	3	0.039
1596519000	5	0.018
1596519000	6	0.0
1596519000	9	0.0
1596519900	2	0.021
1596519900	3	0.039
1596519900	5	0.023
1596519900	6	0.001
1596519900	9	0.011
1596520800	2	0.019
1596520800	3	0.039
1596520800	5	0.014
1596520800	6	0.001
1596520800	9	0.025
1596521700	2	0.007
1596521700	3	0.039
1596521700	5	0.026
1596521700	6	0.001
1596521700	9	0.0
1596522600	2	0.02
1596522600	3	0.039
1596522600	5	0.013
1596522600	6	0.001
1596522600	9	0.025
1596523500	2	0.02
1596523500	3	0.038
1596523500	5	0.027
1596523500	6	0.001
1596523500	9	0.053
1596524400	2	0.008
1596524400	3	0.039
1596524400	5	0.014
1596524400	6	0.001
1596524400	9	0.0
1596525300	2	0.015
1596525300	3	0.039
1596525300	5	0.026
1596525300	6	0.001
1596525300	9	0.0
1596526200	2	0.02
1596526200	3	0.039
1596526200	5	0.015
1596526200	6	0.0
1596526200	9	0.036
1596527100	2	0.013
1596527100	3	0.039
1596527100	5	0.025
1596527100	6	0.001
1596527100	9	0.0
1596528000	2	0.01
1596528000	3	0.039
1596528000	5	0.014
1596528000	6	0.001
1596528000	9	0.007
1596528900	2	0.02
1596528900	3	0.039
1596528900	5	0.026
1596528900	6	0.0
1596528900	9	0.072
1596529800	2	0.017
1596529800	3	0.038
1596529800	5	0.013
1596529800	6	0.0
1596529800	9	0.0
1596530700	2	0.006
1596530700	3	0.039
1596530700	5	0.022
1596530700	6	0.0
1596530700	9	0.0
1596531600	2	0.135
1596531600	3	0.039
1596531600	5	0.016
1596531600	6	0.0
1596531600	9	0.024
1596532500	2	0.192
1596532500	3	0.039
1596532500	5	0.02
1596532500	6	0.0
1596532500	9	0.012
1596533400	2	0.183
1596533400	3	0.038
1596533400	5	0.02
1596533400	6	0.0
1596533400	9	0.0
1596534300	2	0.192
1596534300	3	0.039
1596534300	5	0.016
1596534300	6	0.0
1596534300	9	0.037
1596535200	2	0.199
1596535200	3	0.038
1596535200	5	0.02
1596535200	6	0.0
1596535200	9	0.041
1596536100	2	0.19
1596536100	3	0.038
1596536100	5	0.008
1596536100	6	0.0
1596536100	9	0.0
1596537000	2	0.188
1596537000	3	0.023
1596537000	5	0.02
1596537000	6	0.0
1596537000	9	0.0
1596537900	2	0.199
1596537900	3	0.0
1596537900	5	0.009
1596537900	6	0.003
1596537900	9	0.036
1596538800	2	0.196
1596538800	3	0.0
1596538800	5	0.017
1596538800	6	0.004
1596538800	9	0.001
1596539700	2	0.037
1596539700	3	0.0
1596539700	5	0.012
1596539700	6	0.005
1596539700	9	0.021
1596540600	2	0.059
1596540600	3	0.0
1596540600	5	0.021
1596540600	6	0.005
1596540600	9	0.071
1596541500	2	0.024
1596541500	3	0.0
1596541500	5	0.011
1596541500	6	0.0
1596541500	9	0.018
1596542400	2	0.005
1596542400	3	0.0
1596542400	5	0.027
1596542400	6	0.0
1596542400	9	0.001
1596543300	2	0.02
1596543300	3	0.0
1596543300	5	0.015
1596543300	6	0.0
1596543300	9	0.028
1596544200	2	0.019
1596544200	3	0.0
1596544200	5	0.022
1596544200	6	0.0
1596544200	9	0.015
1596545100	2	0.008
1596545100	3	0.0
1596545100	5	0.008
1596545100	6	0.0
1596545100	9	0.001
1596546000	2	0.036
1596546000	3	0.0
1596546000	5	0.022
1596546000	6	0.0
1596546000	9	0.047
1596546900	2	0.038
1596546900	3	0.0
1596546900	5	0.011
1596546900	6	0.0
1596546900	9	0.034
1596547800	2	0.022
1596547800	3	0.0
1596547800	5	0.022
1596547800	6	0.0
1596547800	9	0.001
1596548700	2	0.042
1596548700	3	0.0
1596548700	5	0.01
1596548700	6	0.0
1596548700	9	0.035
1596549600	2	0.038
1596549600	3	0.0
1596549600	5	0.025
1596549600	6	0.0
1596549600	9	0.001
1596550500	2	0.028
1596550500	3	0.0
1596550500	5	0.009
1596550500	6	0.0
1596550500	9	0.001
1596551400	2	0.058
1596551400	3	0.0
1596551400	5	0.051
1596551400	6	0.0
1596551400	9	0.037
1596552300	2	0.077
1596552300	3	0.0
1596552300	5	0.038
1596552300	6	0.0
1596552300	9	0.036
1596553200	2	0.087
1596553200	3	0.0
1596553200	5	0.106
1596553200	6	0.0
1596553200	9	0.011
1596554100	2	0.113
1596554100	3	0.0
1596554100	5	0.03
1596554100	6	0.0
1596554100	9	0.036
1596555000	2	0.092
1596555000	3	0.0
1596555000	5	0.034
1596555000	6	0.0
1596555000	9	0.001
1596555900	2	0.057
1596555900	3	0.0
1596555900	5	0.036
1596555900	6	0.0
1596555900	9	0.018
1596556800	2	0.049
1596556800	3	0.0
1596556800	5	0.033
1596556800	6	0.0
1596556800	9	0.019
1596557700	2	0.038
1596557700	3	0.0
1596557700	5	0.033
1596557700	6	0.0
1596557700	9	0.069
1596558600	2	0.042
1596558600	3	0.0
1596558600	5	0.031
1596558600	6	0.0
1596558600	9	0.015
1596559500	2	0.048
1596559500	3	0.0
1596559500	5	0.024
1596559500	6	0.0
1596559500	9	0.029
1596560400	2	0.026
1596560400	3	0.0
1596560400	5	0.012
1596560400	6	0.0
1596560400	9	0.009
1596561300	2	0.016
1596561300	3	0.0
1596561300	5	0.026
1596561300	6	0.0
1596561300	9	0.008
1596562200	2	0.034
1596562200	3	0.0
1596562200	5	0.01
1596562200	6	0.0
1596562200	9	0.027
1596563100	2	0.023
1596563100	3	0.0
1596563100	5	0.026
1596563100	6	0.0
1596563100	9	0.042
1596564000	2	0.012
1596564000	3	0.0
1596564000	5	0.011
1596564000	6	0.0
1596564000	9	0.036
1596564900	2	0.023
1596564900	3	0.0
1596564900	5	0.027
1596564900	6	0.0
1596564900	9	0.0
1596565800	2	0.024
1596565800	3	0.0
1596565800	5	0.011
1596565800	6	0.0
1596565800	9	0.004
1596566700	2	0.011
1596566700	3	0.0
1596566700	5	0.027
1596566700	6	0.0
1596566700	9	0.03
1596567600	2	0.019
1596567600	3	0.0
1596567600	5	0.012
1596567600	6	0.0
1596567600	9	0.012
1596568500	2	0.024
1596568500	3	0.0
1596568500	5	0.021
1596568500	6	0.0
1596568500	9	0.065
1596569400	2	0.016
1596569400	3	0.0
1596569400	5	0.014
1596569400	6	0.0
1596569400	9	0.006
1596570300	2	0.016
1596570300	3	0.0
1596570300	5	0.687
1596570300	6	0.0
1596570300	9	0.029
1596571200	2	0.031
1596571200	3	0.0
1596571200	5	0.048
1596571200	6	0.0
1596571200	9	0.037
1596572100	2	0.026
1596572100	3	0.0
1596572100	5	0.067
1596572100	6	0.0
1596572100	9	0.014
1596573000	2	0.018
1596573000	3	0.0
1596573000	5	0.048
1596573000	6	0.0
1596573000	9	0.092
1596573900	2	0.058
1596573900	3	0.0
1596573900	5	0.021
1596573900	6	0.0
1596573900	9	0.017
1596574800	2	0.059
1596574800	3	0.0
1596574800	5	0.02
1596574800	6	0.0
1596574800	9	0.026
1596575700	2	0.041
1596575700	3	0.005
1596575700	5	0.019
1596575700	6	0.0
1596575700	9	0.036
1596576600	2	0.049
1596576600	3	0.036
1596576600	5	0.019
1596576600	6	0.003
1596576600	9	0.012
1596577500	2	0.054
1596577500	3	0.036
1596577500	5	0.043
1596577500	6	0.004
1596577500	9	0.078
1596578400	2	0.042
1596578400	3	0.036
1596578400	5	0.047
1596578400	6	0.003
1596578400	9	0.19
1596579300	2	0.045
1596579300	3	0.036
1596579300	5	0.049
1596579300	6	0.01
1596579300	9	0.433
1596580200	2	0.056
1596580200	3	0.036
1596580200	5	0.053
1596580200	6	0.019
1596580200	9	0.155
1596581100	2	0.023
1596581100	3	0.036
1596581100	5	0.048
1596581100	6	0.019
1596581100	9	0.018
1596582000	2	0.021
1596582000	3	0.037
1596582000	5	0.059
1596582000	6	0.017
1596582000	9	0.037
1596582900	2	0.034
1596582900	3	0.036
1596582900	5	0.046
1596582900	6	0.005
1596582900	9	0.189
1596583800	2	0.034
1596583800	3	0.036
1596583800	5	0.321
1596583800	6	0.001
1596583800	9	0.018
1596584700	2	0.022
1596584700	3	0.037
1596584700	5	0.055
1596584700	6	0.0
1596584700	9	0.052
1596585600	2	0.028
1596585600	3	0.038
1596585600	5	0.071
1596585600	6	0.0
1596585600	9	0.017
1596586500	2	0.034
1596586500	3	0.038
1596586500	5	0.055
1596586500	6	0.0
1596586500	9	0.033
1596587400	2	0.027
1596587400	3	0.038
1596587400	5	0.086
1596587400	6	0.0
1596587400	9	0.069
1596588300	2	0.023
1596588300	3	0.038
1596588300	5	0.11
1596588300	6	0.0
1596588300	9	0.032
1596589200	2	0.033
1596589200	3	0.038
1596589200	5	0.116
1596589200	6	0.0
1596589200	9	0.044
1596590100	2	0.033
1596590100	3	0.038
1596590100	5	0.123
1596590100	6	0.0
1596590100	9	0.026
1596591000	2	0.021
1596591000	3	0.038
1596591000	5	0.983
1596591000	6	0.0
1596591000	9	0.017
1596591900	2	0.03
1596591900	3	0.038
1596591900	5	0.532
1596591900	6	0.0
1596591900	9	0.058
1596592800	2	0.035
1596592800	3	0.038
1596592800	5	0.122
1596592800	6	0.0
1596592800	9	0.067
1596593700	2	0.027
1596593700	3	0.038
1596593700	5	0.072
1596593700	6	0.0
1596593700	9	0.02
1596594600	2	0.024
1596594600	3	0.039
1596594600	5	0.077
1596594600	6	0.0
1596594600	9	0.051
1596595500	2	0.034
1596595500	3	0.038
1596595500	5	0.046
1596595500	6	0.0
1596595500	9	0.016
1596596400	2	0.032
1596596400	3	0.038
1596596400	5	0.061
1596596400	6	0.001
1596596400	9	0.016
1596597300	2	0.012
1596597300	3	0.038
1596597300	5	0.042
1596597300	6	0.003
1596597300	9	0.058
1596598200	2	0.022
1596598200	3	0.038
1596598200	5	0.031
1596598200	6	0.002
1596598200	9	0.025
1596599100	2	0.021
1596599100	3	0.039
1596599100	5	0.019
1596599100	6	0.003
1596599100	9	0.0
1596600000	2	0.01
1596600000	3	0.038
1596600000	5	0.017
1596600000	6	0.002
1596600000	9	0.036
1596600900	2	0.015
1596600900	3	0.039
1596600900	5	0.018
1596600900	6	0.001
1596600900	9	0.0
1596601800	2	0.021
1596601800	3	0.038
1596601800	5	0.015
1596601800	6	0.001
1596601800	9	0.0
1596602700	2	0.016
1596602700	3	0.039
1596602700	5	0.018
1596602700	6	0.0
1596602700	9	0.061
1596603600	2	0.009
1596603600	3	0.038
1596603600	5	0.009
1596603600	6	0.001
1596603600	9	0.018
1596604500	2	0.021
1596604500	3	0.039
1596604500	5	0.024
1596604500	6	0.001
1596604500	9	0.0
1596605400	2	0.021
1596605400	3	0.038
1596605400	5	0.008
1596605400	6	0.001
1596605400	9	0.034
1596606300	2	0.007
1596606300	3	0.039
1596606300	5	0.024
1596606300	6	0.001
1596606300	9	0.001
1596607200	2	0.017
1596607200	3	0.038
1596607200	5	0.011
1596607200	6	0.0
1596607200	9	0.0
1596608100	2	0.021
1596608100	3	0.039
1596608100	5	0.024
1596608100	6	0.001
1596608100	9	0.056
1596609000	2	0.012
1596609000	3	0.038
1596609000	5	0.01
1596609000	6	0.001
1596609000	9	0.023
1596609900	2	0.013
1596609900	3	0.039
1596609900	5	0.02
1596609900	6	0.0
[truncated: 8,000 more rows]
